# Supplementary material
Source: MDPI journal article supplement (https://www.mdpi.com/2073-4441/15/8/1631)
Supplement: s1 [file s1]

**Supplementary material (Figure S1)** in Koivusalo, H.; Dubovik, M.; Wendling, L.; Assmuth, E.; Sillanpää, N.; Kokkonen, T. Performance of Sand and Mixed Sand–Biochar Filters for Treatment of Road Runoff Quantity and Quality. *Water* **2023**, *15*, 1631. <https://doi.org/10.3390/w15081631>

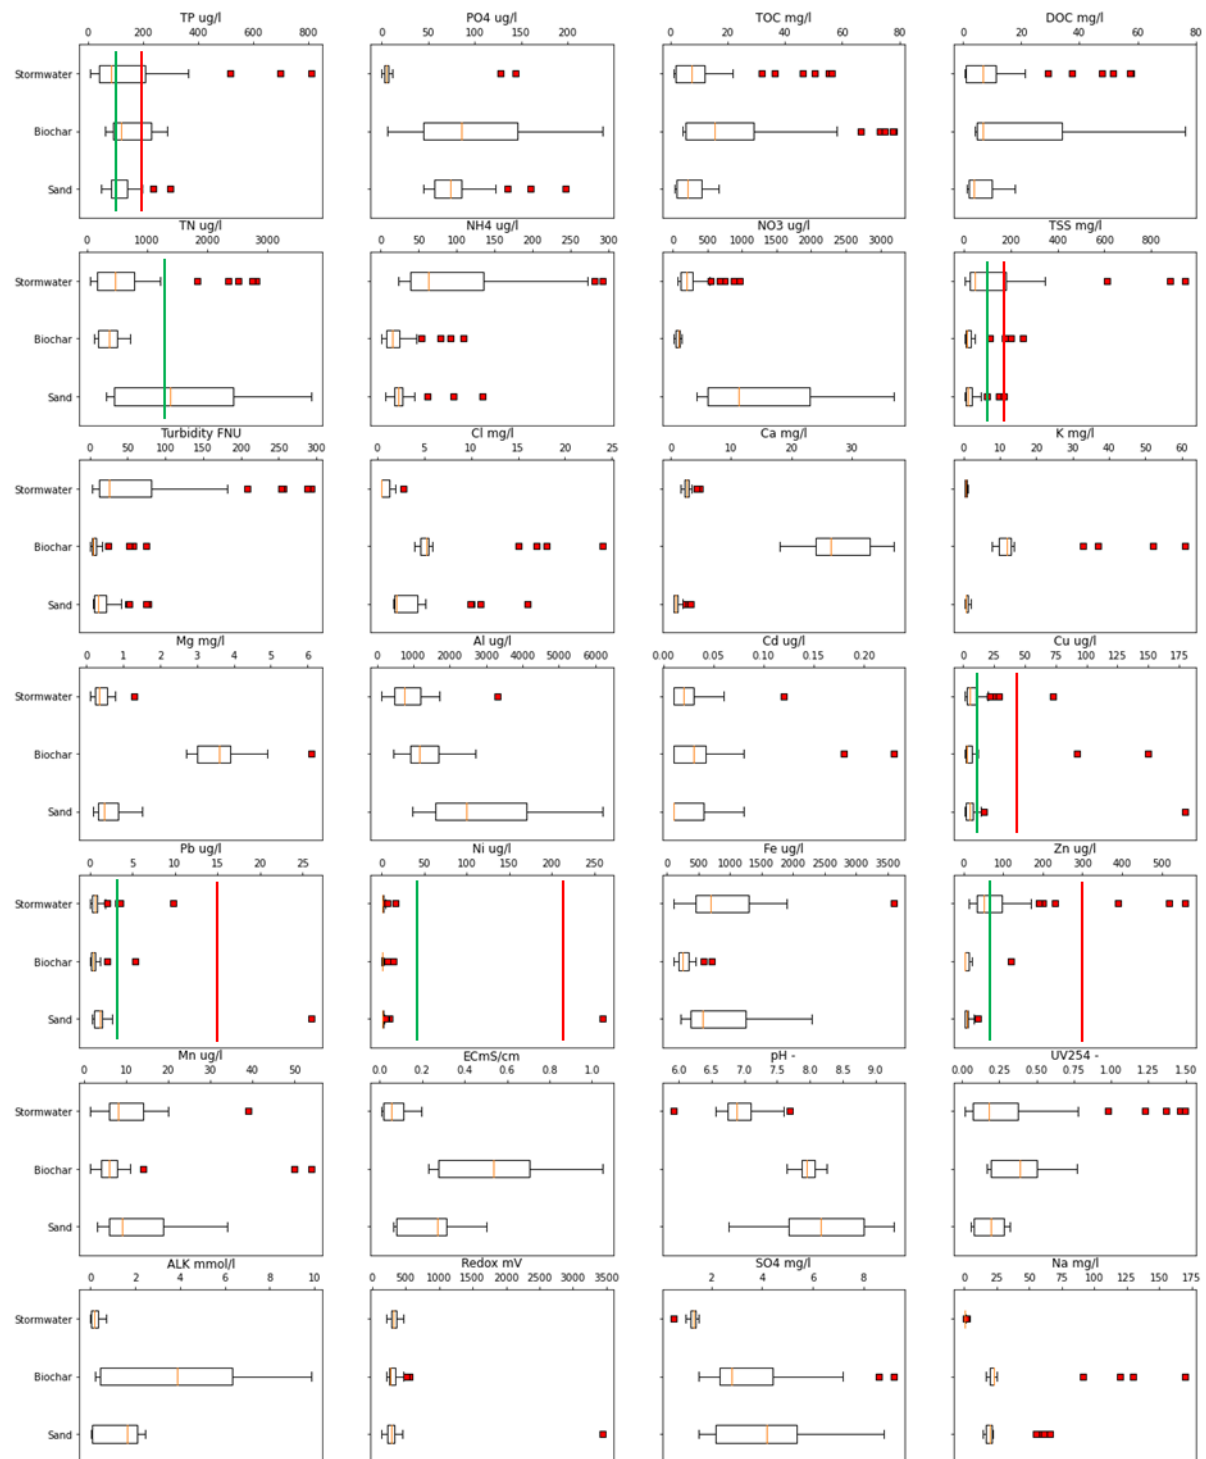

**Figure S1.** The box plots of the stormflow influent, sand filter effluent, and sand-biochar filter effluent data. The green and red vertical lines refer to the lower and higher threshold of stormwater concentration in [45].
